# Supplementary material
Source: publisher figshare collection journal article supplement (https://acs.figshare.com/ndownloader/files/4403593)
Supplement: Supplementary file 1 [file 4403593]

## SUPPORTING INFORMATION

### Effects of Conformational Restriction on A<sub>1</sub> Adenosine Receptor Modulation by 2-Amino-3-benzoylthiophenes

Luigi Aurelio,<sup>†,a</sup> Celine Valant,<sup>†,‡,a</sup> Bernard L. Flynn,<sup>†</sup> Patrick M. Sexton,<sup>†,‡</sup> Jonathan M. White,<sup>§</sup>  
Arthur Christopoulos,<sup>†,‡,\*</sup> and Peter J. Scammells<sup>†,\*</sup>

<sup>†</sup>*Medicinal Chemistry and Drug Action, Monash Institute of Pharmaceutical Sciences, Monash University, 381 Royal Parade, Parkville VIC 3052, Australia,* <sup>‡</sup>*Drug Discovery Biology Laboratory, Department of Pharmacology, Monash University, Clayton, VIC 3800, Australia,* <sup>§</sup>*School of Chemistry, The University of Melbourne, VIC 3010, Australia and the Bio21 Molecular Science and Biotechnology Institute, The University of Melbourne, VIC 3010, Australia*

#### Contents

|            |                   |
|------------|-------------------|
| <b>S-1</b> | Title Page        |
| <b>S-2</b> | Compound Analysis |

## Compound Analysis

Compound purity was analysed on an Agilent 1200 Series LCMS system, incorporating a photodiode array detector (214/254 nm) coupled directly to an electrospray ionization source and a single quadrupole mass analyser (Agilent 6120 Quadrupole MS). Chromatograms show UV absorbance at 254 nm. RP-HPLC was carried out at 30 °C employing a Phenomenex column (Luna 5 $\mu$ m C8(2), 50 x 4.60 mm ID). The following buffers were used; buffer A 99.9% H<sub>2</sub>O, 0.1% Formic acid and buffer B 99.9% CH<sub>3</sub>CN, 0.1% formic acid. The following gradient was used with a flow rate of 0.5 mL/min and total run time of 12 min; 0–4 min 95% buffer A and 5% buffer B, 4–7 min 0% buffer A and 100% buffer B, 7–12 min 95% buffer A and 5% buffer B. Mass spectra were acquired in positive and negative ion mode with a scan range of 0–1000 m/z at 5V. All compounds were of  $\geq 95\%$  purity.

### 1-Amino-8*H*-indeno[1,2-*c*]thiophen-8-one (14a)

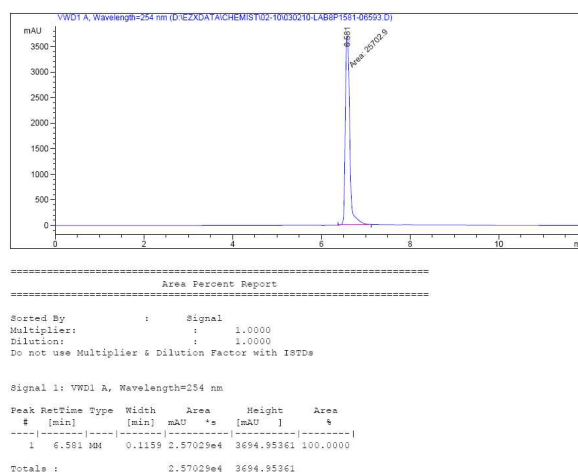

### 1-Amino-5-chloro-8*H*-indeno[1,2-*c*]thiophen-8-one (14b)

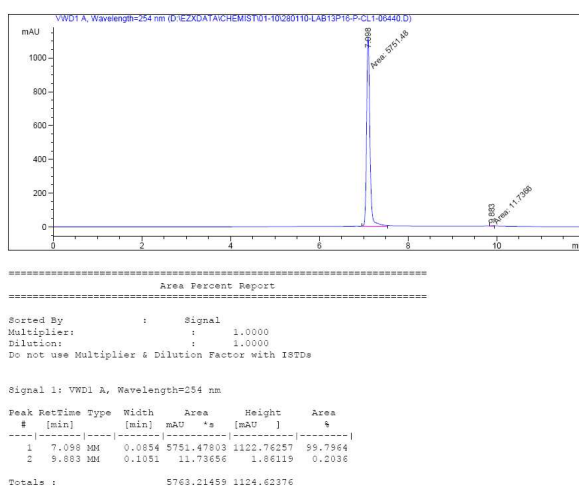

### 1-Amino-7-chloro-8*H*-indeno[1,2-*c*]thiophen-8-one (14c)

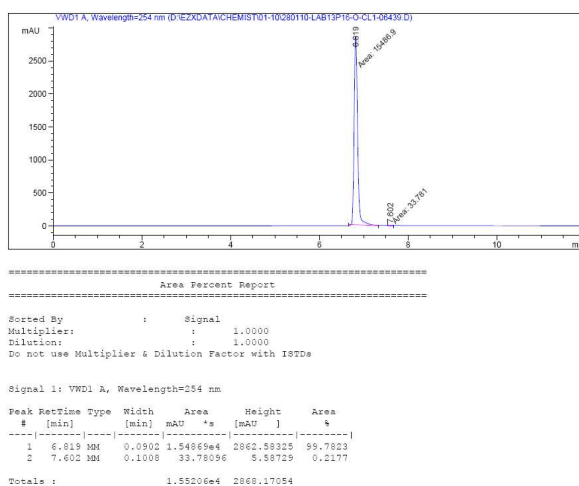

### 1-Amino-3-phenyl-8*H*-indeno[1,2-*c*]thiophen-8-one (17a)

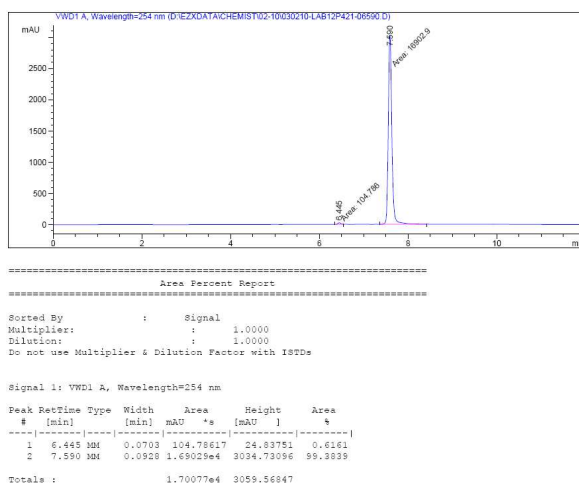

## 1-Amino-3-(4-methoxyphenyl)-8*H*-indeno[1,2-*c*]thiophen-8-one (17b)

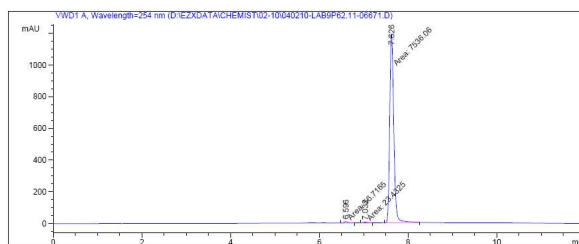

=====  
Area Percent Report  
=====

Sorted By : Signal  
Multiplier: : 1.0000  
Dilution: : 1.0000  
Use Multiplier & Dilution Factor with ISTDs

Signal 1: VWD1 A, Wavelength=254 nm

| Peak #   | RetTime [min] | Type | Width [min] | Area mAU   | Height [mAU] | Area %  |
|----------|---------------|------|-------------|------------|--------------|---------|
| 1        | 6.596         | HM   | 0.1114      | 56.71602   | 8.48223      | 0.7447  |
| 2        | 7.032         | HM   | 0.1071      | 23.43254   | 3.64531      | 0.3077  |
| 3        | 7.626         | HM   | 0.1053      | 7536.05559 | 1192.24170   | 98.9477 |
| Totals : |               |      |             | 7616.20766 | 1204.36924   |         |

## 1-Amino-3-(4-(dimethylamino)phenyl)-8*H*-indeno[1,2-*c*]thiophen-8-one (17c)

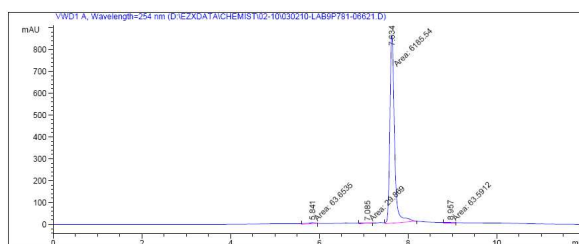

=====  
Area Percent Report  
=====

Sorted By : Signal  
Multiplier: : 1.0000  
Dilution: : 1.0000  
Use Multiplier & Dilution Factor with ISTDs

Signal 1: VWD1 A, Wavelength=254 nm

| Peak #   | RetTime [min] | Type | Width [min] | Area mAU   | Height [mAU] | Area %  |
|----------|---------------|------|-------------|------------|--------------|---------|
| 1        | 5.841         | HM   | 0.2107      | 69.65954   | 5.03486      | 1.0036  |
| 2        | 7.085         | HM   | 0.3105      | 29.86897   | 1.60325      | 0.4709  |
| 3        | 7.634         | HM   | 0.1197      | 6185.54346 | 861.43536    | 97.5229 |
| 4        | 8.957         | HM   | 0.2524      | 69.59125   | 4.19906      | 1.0026  |
| Totals : |               |      |             | 6342.65721 | 872.27258    |         |

## 1-Amino-3-(pyrimidin-5-yl)-8*H*-indeno[1,2-*c*]thiophen-8-one (17d)

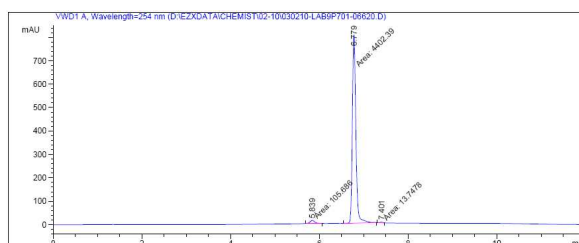

=====  
Area Percent Report  
=====

Sorted By : Signal  
Multiplier: : 1.0000  
Dilution: : 1.0000  
Use Multiplier & Dilution Factor with ISTDs

Signal 1: VWD1 A, Wavelength=254 nm

| Peak #   | RetTime [min] | Type | Width [min] | Area mAU   | Height [mAU] | Area %  |
|----------|---------------|------|-------------|------------|--------------|---------|
| 1        | 5.839         | HM   | 0.1332      | 105.68593  | 13.22127     | 2.3372  |
| 2        | 6.779         | HM   | 0.0912      | 4402.39404 | 804.93073    | 97.1557 |
| 3        | 7.401         | HM   | 0.0796      | 13.74779   | 2.87723      | 0.3040  |
| Totals : |               |      |             | 4521.82777 | 821.02923    |         |

### 1-Amino-3-(pyridin-4-yl)-8H-indeno[1,2-c]thiophen-8-one (17e)

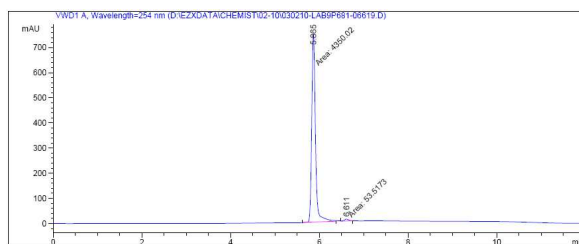

=====  
Area Percent Report  
=====

Sorted By : Signal  
Multiplier: : 1.0000  
Dilution: : 1.0000  
Use Multiplier & Dilution Factor with ISTDs

Signal 1: VWD1 A, Wavelength=254 nm

| Peak #   | RetTime [min] | Type | Width [min] | Area mAU   | Height *s | Area [mAU] | % |
|----------|---------------|------|-------------|------------|-----------|------------|---|
| 1        | 5.865         | HM   | 0.0966      | 4350.02100 | 750.44495 | 58.7847    |   |
| 2        | 6.611         | HM   | 0.1116      | 53.51729   | 7.59510   | 1.2153     |   |
| Totals : |               |      |             | 4403.53829 | 758.44005 |            |   |

### 4-(1-Amino-8-oxo-8H-indeno[1,2-c]thiophen-3-yl)benzoic acid (17f)

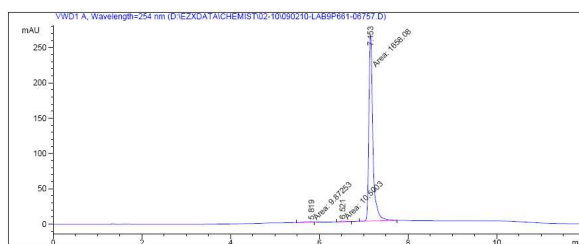

=====  
Area Percent Report  
=====

Sorted By : Signal  
Multiplier: : 1.0000  
Dilution: : 1.0000  
Use Multiplier & Dilution Factor with ISTDs

Signal 1: VWD1 A, Wavelength=254 nm

| Peak #   | RetTime [min] | Type | Width [min] | Area mAU   | Height *s  | Area [mAU] | % |
|----------|---------------|------|-------------|------------|------------|------------|---|
| 1        | 5.819         | HM   | 0.3045      | 5.87253    | 5.40330e-1 | 0.5882     |   |
| 2        | 6.521         | HM   | 0.1593      | 10.50029   | 1.09983    | 0.6256     |   |
| 3        | 7.153         | HM   | 0.1090      | 1658.07849 | 263.6376   | 98.7862    |   |
| Totals : |               |      |             | 1678.45130 | 264.90292  |            |   |

### (2-Aminothiophen-3-yl)(phenyl)methanone (20a)

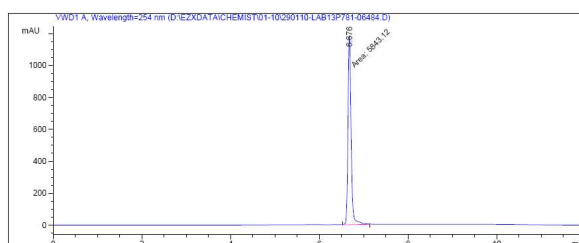

=====  
Area Percent Report  
=====

Sorted By : Signal  
Multiplier: : 1.0000  
Dilution: : 1.0000  
Do not use Multiplier & Dilution Factor with ISTDs

Signal 1: VWD1 A, Wavelength=254 nm

| Peak #   | RetTime [min] | Type | Width [min] | Area mAU   | Height *s  | Area [mAU] | % |
|----------|---------------|------|-------------|------------|------------|------------|---|
| 1        | 6.676         | HM   | 0.0620      | 5843.11768 | 1187.27930 | 100.0000   |   |
| Totals : |               |      |             | 5843.11768 | 1187.27930 |            |   |

**(2-Aminothiophen-3-yl)(4-chlorophenyl)methanone (20b)**

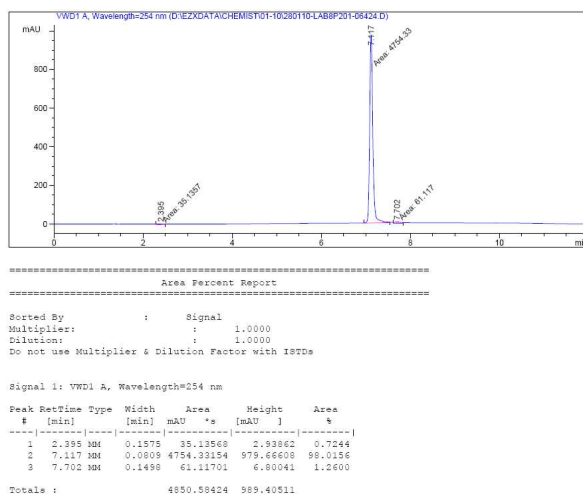

**(2-Amino-5-phenylthiophen-3-yl)(phenyl)methanone (22a)**

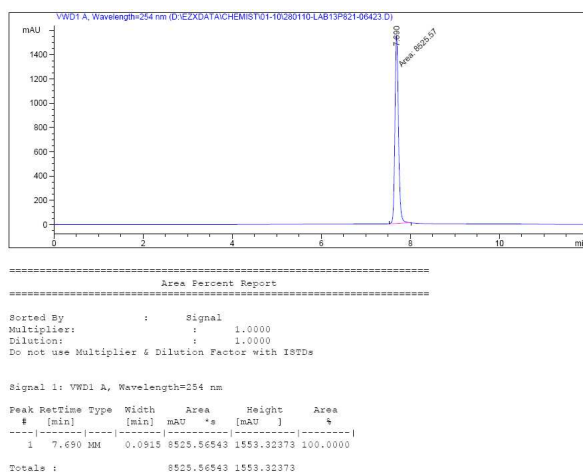

**(2-Amino-5-(4-methoxyphenyl)thiophen-3-yl)(phenyl)methanone (22b)**

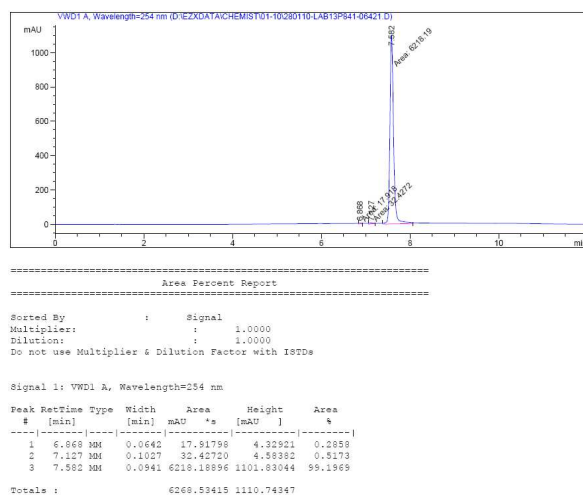

**(2-Amino-5-(4-(dimethylamino)phenyl)thiophen-3-yl)(phenyl)methanone (22c)**

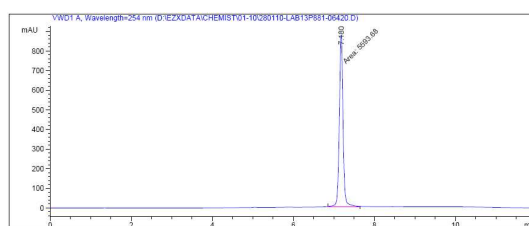

```

=====
Area Percent Report
=====
Sorted By      :      Signal
Multiplier:    :      1.0000
Dilution:      :      1.0000
Do not use Multiplier & Dilution Factor with ISTDs

Signal 1: VWD1 A, Wavelength=254 nm

Peak RetTime Type Width Area Height Area
# [min] [min] [min] mAU %s [mAU ] %
-----
1 7.160 NM 0.1062 5593.67529 878.16022 100.0000
Totals :                5593.67529 878.16022

```

**(2-Amino-5-(pyrimidin-5-yl)thiophen-3-yl)(phenyl)methanone (22d)**

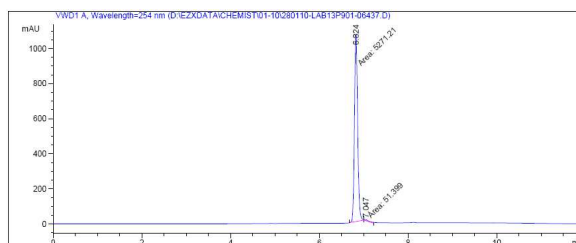

```

=====
Area Percent Report
=====
Sorted By      :      Signal
Multiplier:    :      1.0000
Dilution:      :      1.0000
Do not use Multiplier & Dilution Factor with ISTDs

Signal 1: VWD1 A, Wavelength=254 nm

Peak RetTime Type Width Area Height Area
# [min] [min] [min] mAU %s [mAU ] %
-----
1 6.824 NM 0.0821 5271.20605 1069.82849 99.0343
2 7.047 NM 0.1301 51.39905 6.58260 0.9657
Totals :                5322.60510 1076.41109

```

**(2-Amino-5-(pyridin-4-yl)thiophen-3-yl)(phenyl)methanone (22e)**

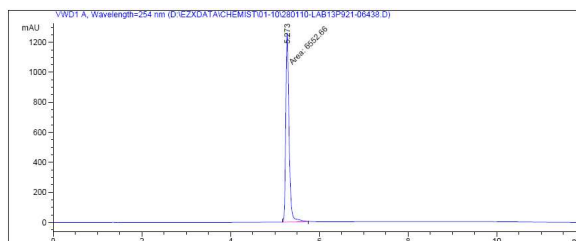

```

=====
Area Percent Report
=====
Sorted By      :      Signal
Multiplier:    :      1.0000
Dilution:      :      1.0000
Do not use Multiplier & Dilution Factor with ISTDs

Signal 1: VWD1 A, Wavelength=254 nm

Peak RetTime Type Width Area Height Area
# [min] [min] [min] mAU %s [mAU ] %
-----
1 5.273 NM 0.0864 6552.66064 1264.05383 100.0000
Totals :                6552.66064 1264.05383

```

### 4-(5-Amino-4-benzoylthiophen-2-yl)benzoic acid (22f)

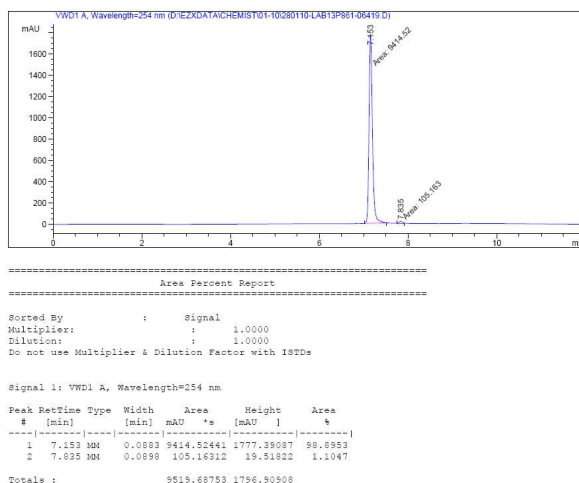

### (2-Amino-5-phenylthiophen-3-yl)(4-chlorophenyl)methanone (23a)

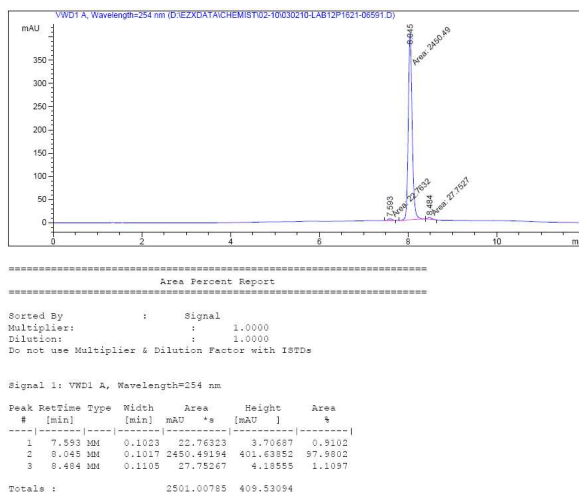

### (2-Amino-5-(4-methoxyphenyl)thiophen-3-yl)(4-chlorophenyl)methanone (23b)

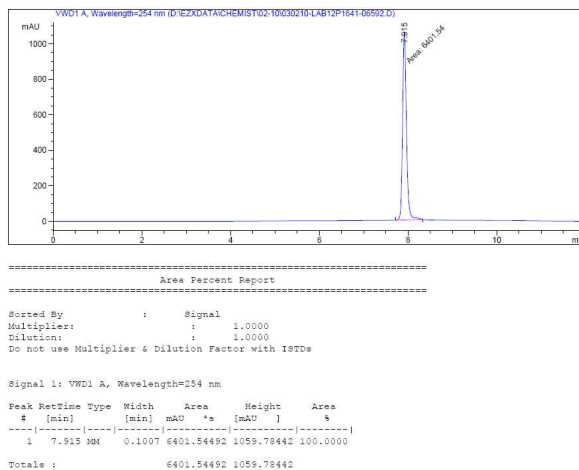



**(2-Amino-5-(4-(dimethylamino)phenyl)thiophen-3-yl)(4-chlorophenyl)methanone (23c)**

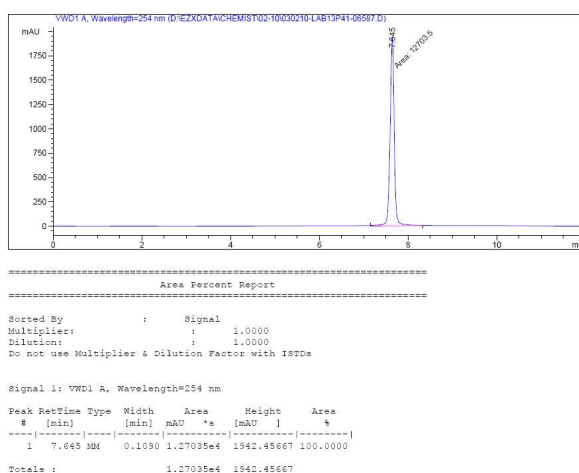

**(2-Amino-5-(pyrimidin-5-yl)thiophen-3-yl)(4-chlorophenyl)methanone (23d)**

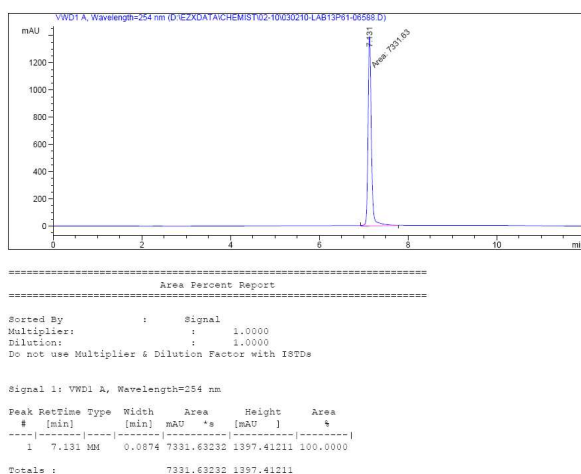

**(2-Amino-5-(pyridin-4-yl)thiophen-3-yl)(4-chlorophenyl)methanone (23e)**

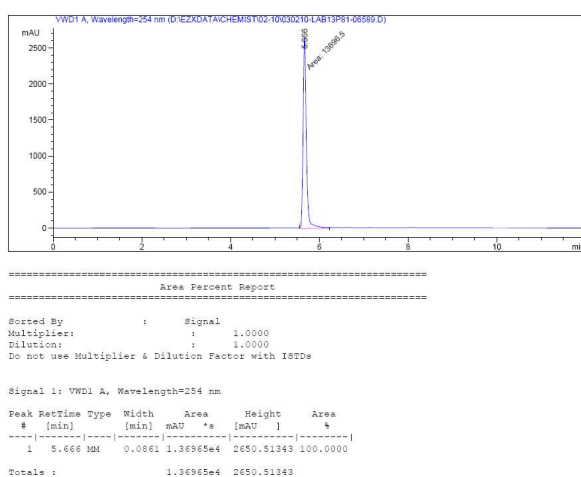

### 4-(5-Amino-4-(4-chlorobenzoyl)thiophen-2-yl)benzoic acid (23f)

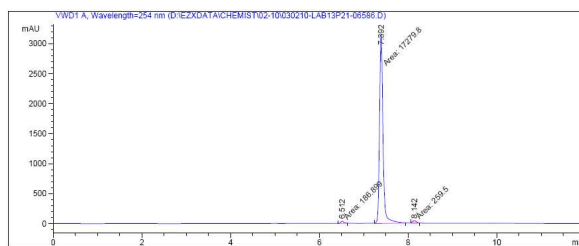

Area Percent Report

Sorted By : Signal  
Multiplier: 1.0000  
Dilution: 1.0000  
Do not use Multiplier & Dilution Factor with ISTDs

Signal 1: VWD1 A, Wavelength=254 nm

| Peak # | RetTime [min] | Type | Width [min] | Area mAU  | Height *s  | Area [mAU] | % |
|--------|---------------|------|-------------|-----------|------------|------------|---|
| 1      | 6.512         | NM   | 0.0812      | 186.89851 | 38.34509   | 1.0544     |   |
| 2      | 7.392         | NM   | 0.0911      | 1.72798e4 | 3161.96975 | 97.4817    |   |
| 3      | 8.142         | NM   | 0.1039      | 258.45951 | 41.63106   | 1.4639     |   |
| Totals |               |      |             | 1.77262e4 | 3241.94492 |            |   |

### (2-Amino-8H-indeno[2,1-b]thiophen-3-yl)(phenyl)methanone (25a)

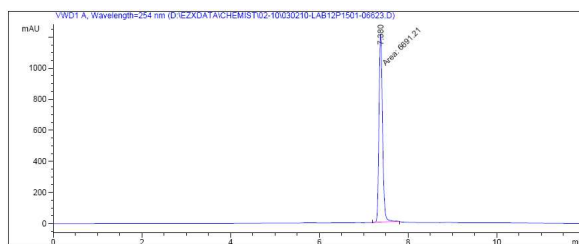

Area Percent Report

Sorted By : Signal  
Multiplier: 1.0000  
Dilution: 1.0000  
Use Multiplier & Dilution Factor with ISTDs

Signal 1: VWD1 A, Wavelength=254 nm

| Peak # | RetTime [min] | Type | Width [min] | Area mAU   | Height *s  | Area [mAU] | % |
|--------|---------------|------|-------------|------------|------------|------------|---|
| 1      | 7.380         | NM   | 0.0919      | 6691.20752 | 1213.28845 | 100.0000   |   |
| Totals |               |      |             | 6691.20752 | 1213.28845 |            |   |

### (2-Amino-8H-indeno[2,1-b]thiophen-3-yl)(4-chlorophenyl)methanone (25b)

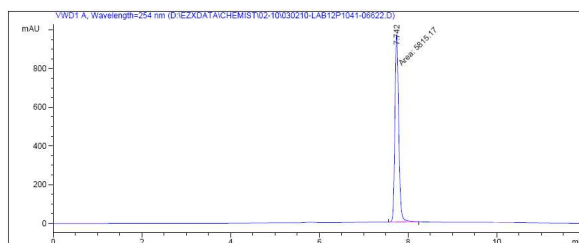

Area Percent Report

Sorted By : Signal  
Multiplier: 1.0000  
Dilution: 1.0000  
Use Multiplier & Dilution Factor with ISTDs

Signal 1: VWD1 A, Wavelength=254 nm

| Peak # | RetTime [min] | Type | Width [min] | Area mAU   | Height *s | Area [mAU] | % |
|--------|---------------|------|-------------|------------|-----------|------------|---|
| 1      | 7.742         | NM   | 0.0996      | 5815.17188 | 972.98468 | 100.0000   |   |
| Totals |               |      |             | 5815.17188 | 972.98468 |            |   |

**(2-Amino-7-(trifluoromethyl)-8*H*-indeno[2,1-*b*]thiophen-3-yl)(phenyl)methanone (25c)**

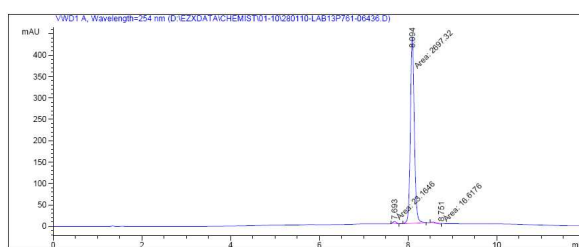

Area Percent Report

Sorted By: Signal  
Multiplier: 1.0000  
Dilution: 1.0000  
Do not use Multiplier & Dilution Factor with ISTDs

Signal 1: VWD1 A, Wavelength=254 nm

| Peak #  | RetTime [min] | Type | Width [min] | Area mAU   | Height    | Area %  |
|---------|---------------|------|-------------|------------|-----------|---------|
| 1       | 7.693         | NM   | 0.0828      | 23.16458   | 4.66454   | 0.8463  |
| 2       | 8.094         | NM   | 0.1030      | 2697.31665 | 436.31332 | 58.5466 |
| 3       | 8.751         | NM   | 0.1402      | 16.41759   | 1.87556   | 0.6071  |
| Totals: |               |      |             | 2737.09683 | 442.95382 |         |

**(2-Amino-7-(trifluoromethyl)-8*H*-indeno[2,1-*b*]thiophen-3-yl)(4-chlorophenyl)methanone (25d)**

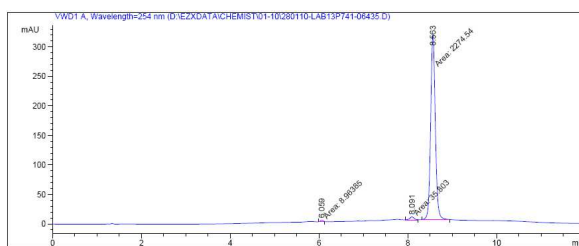

Area Percent Report

Sorted By: Signal  
Multiplier: 1.0000  
Dilution: 1.0000  
Do not use Multiplier & Dilution Factor with ISTDs

Signal 1: VWD1 A, Wavelength=254 nm

| Peak #  | RetTime [min] | Type | Width [min] | Area mAU   | Height    | Area %  |
|---------|---------------|------|-------------|------------|-----------|---------|
| 1       | 8.059         | NM   | 0.0661      | 8.56385    | 2.25920   | 0.3865  |
| 2       | 8.091         | NM   | 0.1149      | 35.80302   | 5.19439   | 1.5437  |
| 3       | 8.563         | NM   | 0.1212      | 2274.54370 | 312.77423 | 98.0698 |
| Totals: |               |      |             | 2319.31056 | 320.22782 |         |

**(2-Amino-5-(trifluoromethyl)-8*H*-indeno[2,1-*b*]thiophen-3-yl)(phenyl)methanone (25e)**

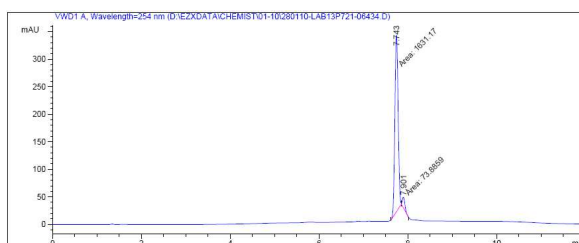

Area Percent Report

Sorted By: Signal  
Multiplier: 1.0000  
Dilution: 1.0000  
Do not use Multiplier & Dilution Factor with ISTDs

Signal 1: VWD1 A, Wavelength=254 nm

| Peak #  | RetTime [min] | Type | Width [min] | Area mAU   | Height    | Area %  |
|---------|---------------|------|-------------|------------|-----------|---------|
| 1       | 7.743         | NM   | 0.0845      | 1631.17273 | 321.61270 | 55.6667 |
| 2       | 7.901         | NM   | 0.0631      | 73.88591   | 19.50391  | 4.3333  |
| Totals: |               |      |             | 1705.05864 | 341.11651 |         |

**(2-Amino-5-(trifluoromethyl)-8*H*-indeno[2,1-*b*]thiophen-3-yl)(4-chlorophenyl)methanone (25f)**

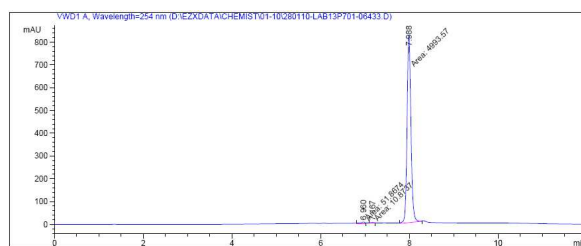

=====  
Area Percent Report  
=====

Sorted By : Signal  
Multiplier: : 1.0000  
Dilution: : 1.0000  
Do not use Multiplier & Dilution Factor with ISTDs

Signal 1: VWD1 A, Wavelength=254 nm

| Peak # | RetTime [min] | Type | Width [min] | Area mAU   | Area %    | Height [mAU] | Area % |
|--------|---------------|------|-------------|------------|-----------|--------------|--------|
| 1      | 6.960         | MM   | 0.1296      | 51.86741   | 6.57173   | 1.0258       |        |
| 2      | 7.167         | MM   | 0.0924      | 10.87365   | 1.36156   | 0.2151       |        |
| 3      | 7.988         | MM   | 0.1009      | 4593.57129 | 824.62311 | 98.7592      |        |

Totals : 5056.31235 833.25640
